# Supplementary material for: Bioinformatic characterization of angiotensin-converting enzyme 2, the entry receptor for SARS-CoV-2
Source: PubMed Central journal article supplement (PMC7592753; doi:10.1371/journal.pone.0240647), 2020-10-28

**A**

homo\_sapiens  
ACE2-201 ENST00000252519

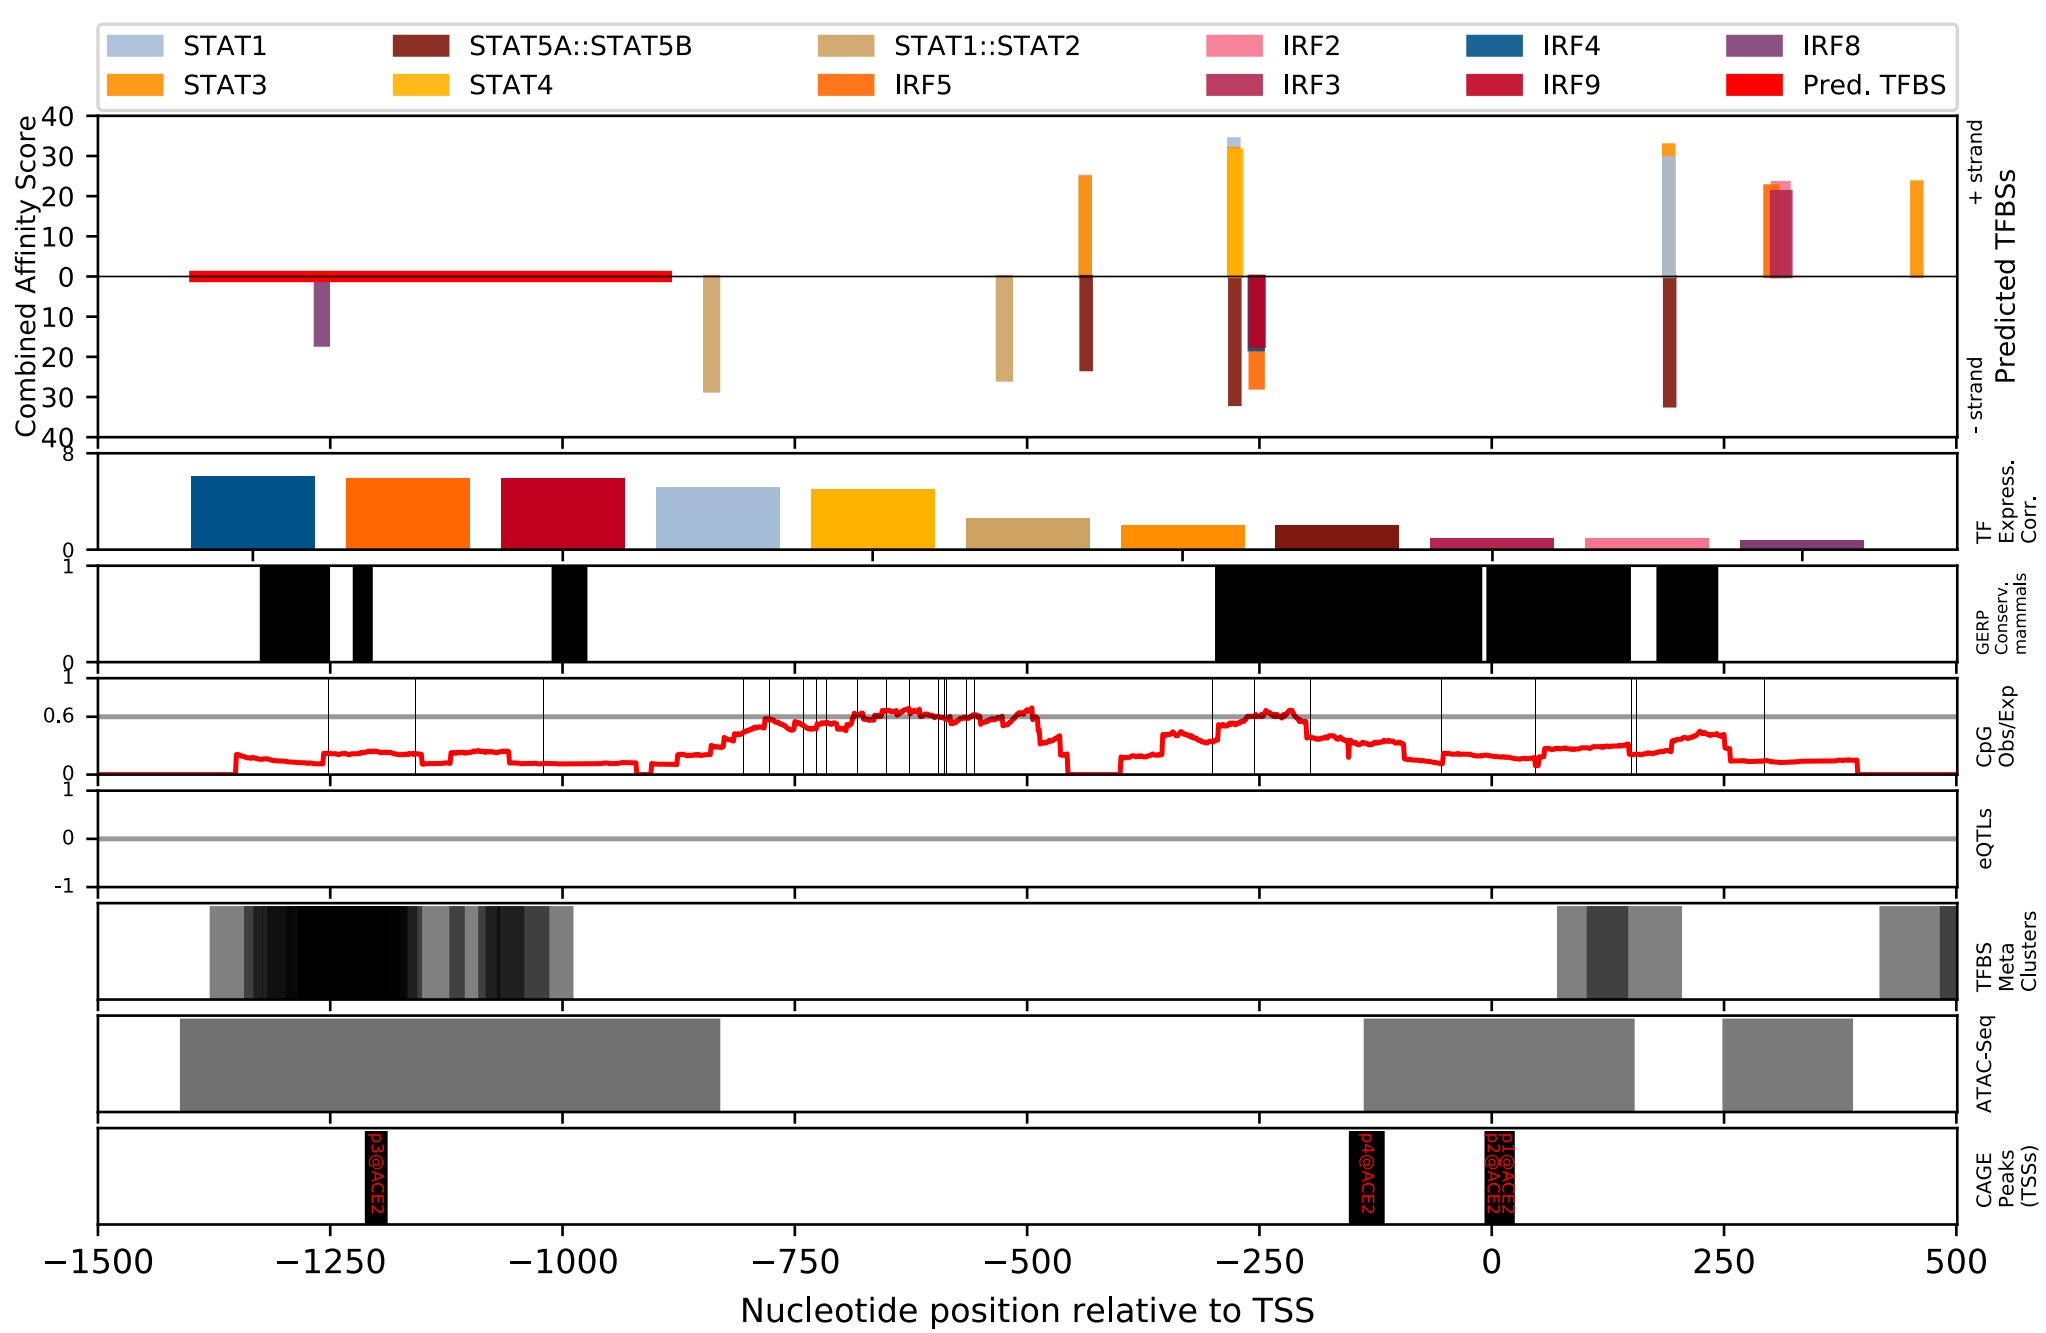**B**

homo\_sapiens  
ACE2-202 ENST00000427411

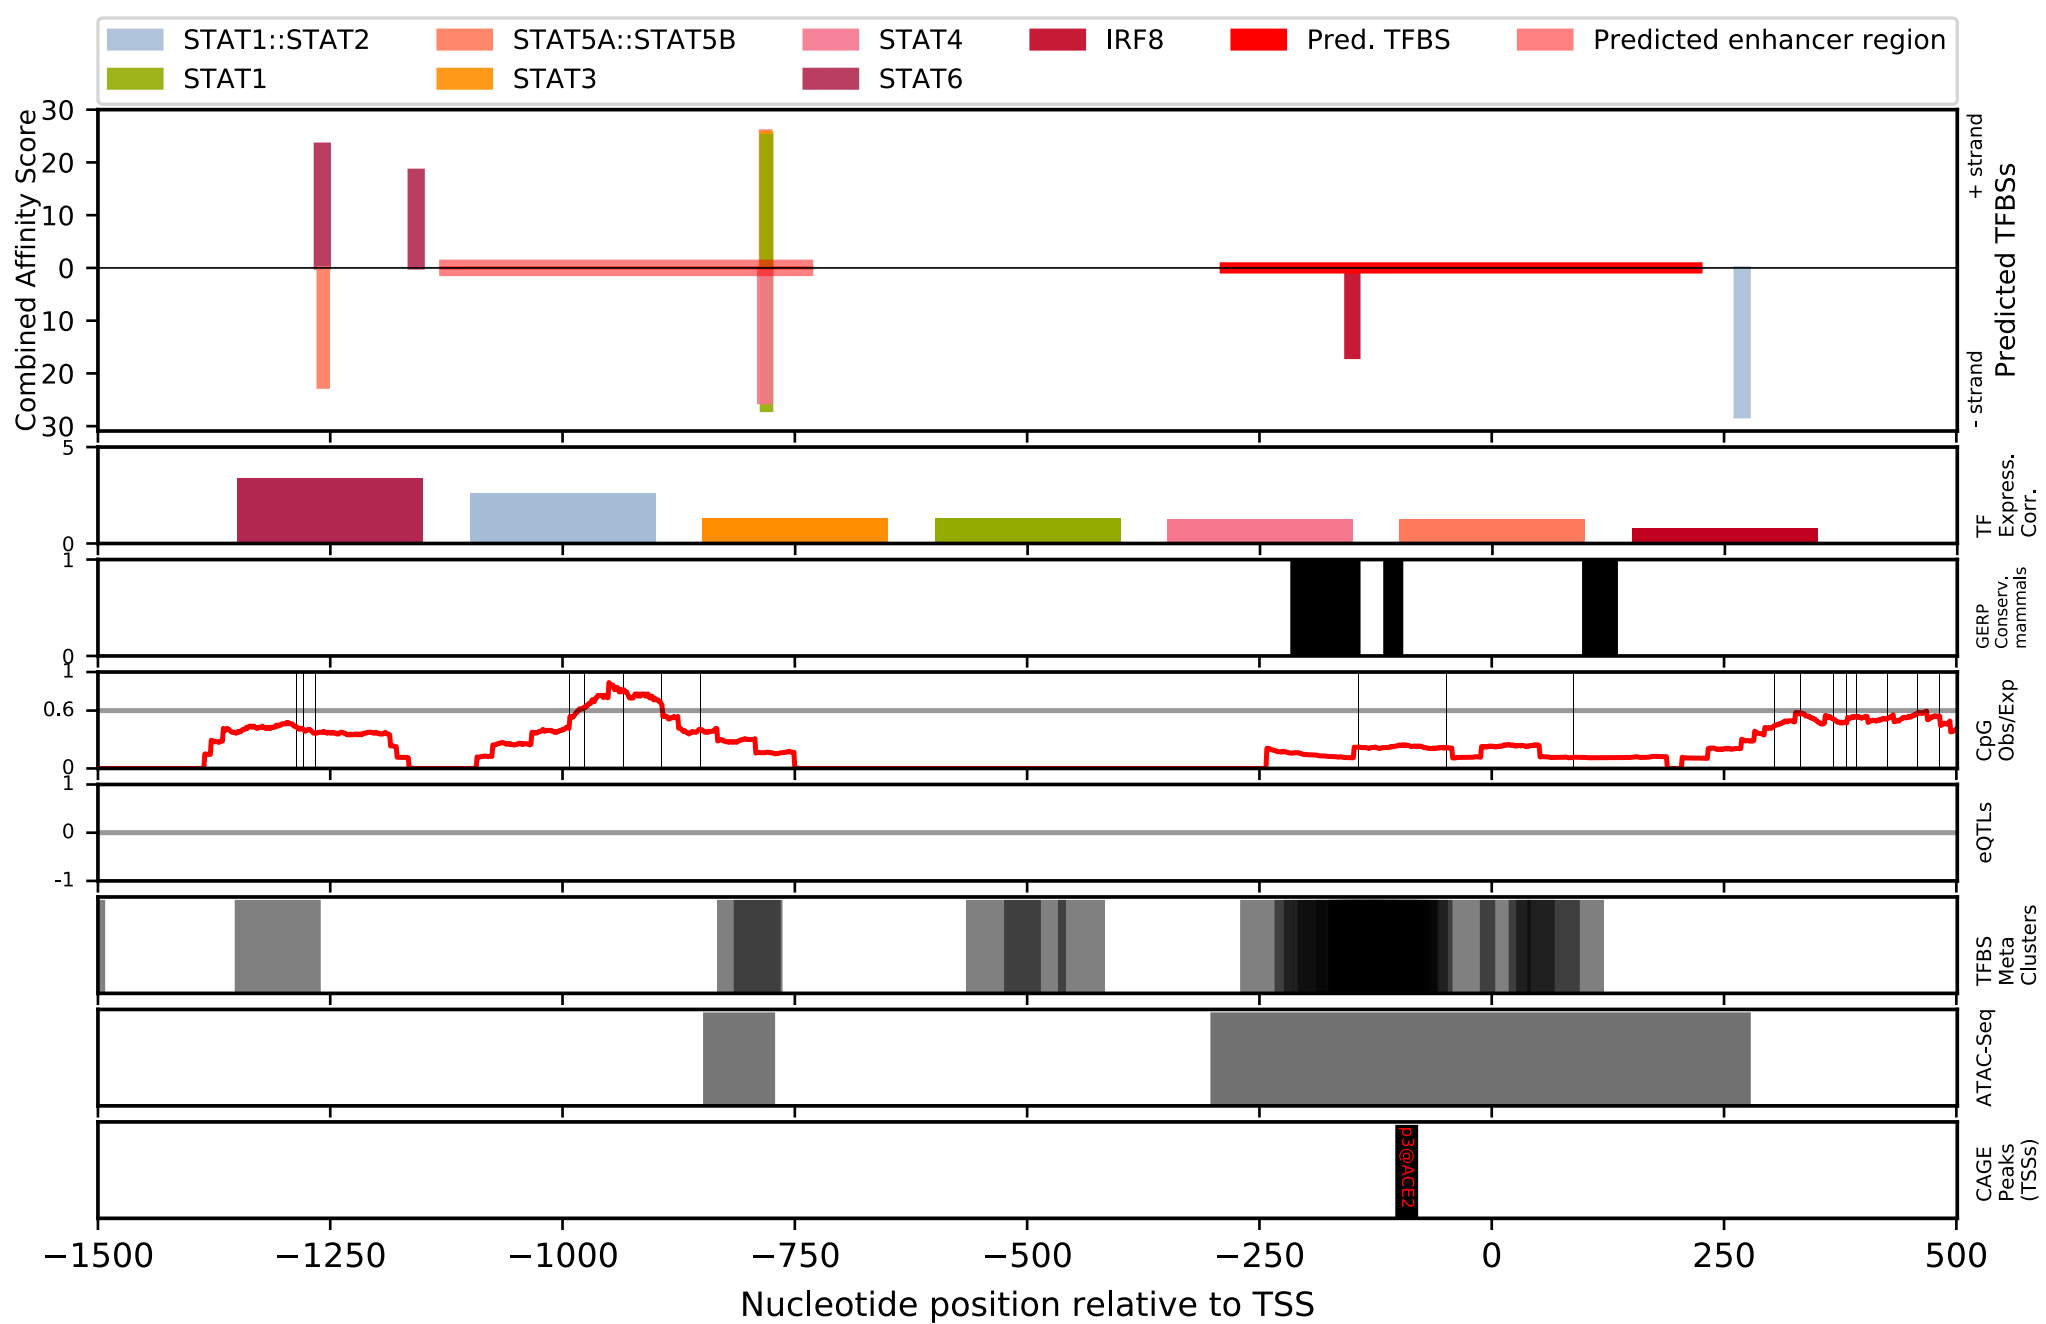

Supplement: pone.0240647.s001.pdf [file pone.0240647.s001.pdf]
